# Supplementary material
Source: Springer Nature journal article supplement (https://www.springermedizin.de/resource/supplementary/12947_2006_136_MOESM2_ESM.pdf/9556402)

**A**

Size/weight paradox  
Myocell slippage

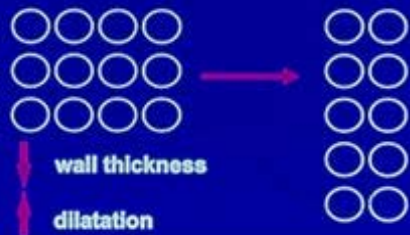**B**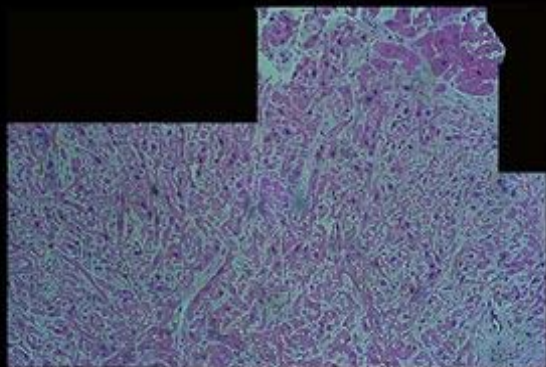**C**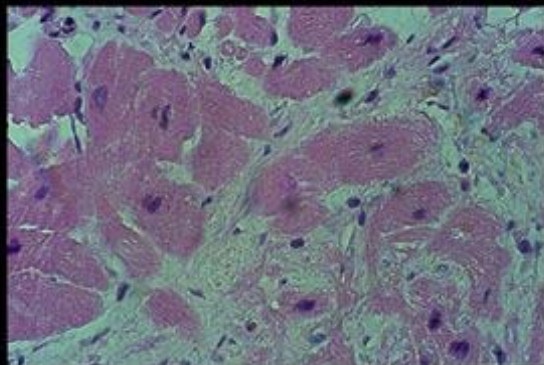**D**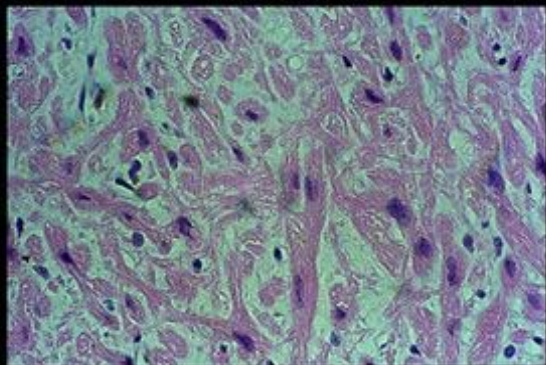

Supplement: MOESM2 [file 9556402]
